# Supplementary material for: A Novel Fibrin Matrix Derived from Platelet-Rich Plasma: Protocol and Characterization
Source: MDPI journal article supplement (doi:10.3390/ijms25074069), 2024-04-06
Supplement: s1 [file s1]

**Table S1. Comparison between autologous and commercial matrices**

|                          | FM  | FM-HF | Tisseel® |
|--------------------------|-----|-------|----------|
| Fibrinogen Concentration | +   | ++    | +++ [23] |
| Young's modulus          | +++ | +     | + [46]   |
| Adhesiveness             | +   | +++   | +++ [23] |
| Cell proliferation       | +++ | ++    | + [47]   |

*FM: Fibrin Matrix; FM-HF: fibrin matrix with high fibrinogen content; the degree of effect is classified as low (+), medium (++) or high (+++), comparing the 3 formulations with each other.*
