# Supplementary material for: A Novel Fibrin Matrix Derived from Platelet-Rich Plasma: Protocol and Characterization
Source: Int J Mol Sci. 2024 Apr 6;25(7):4069. doi: 10.3390/ijms25074069 (PMC11012499; doi:10.3390/ijms25074069)
Supplement: Supplementary file 1 [file ijms-25-04069-s001.zip]

Archive with 5 entries (5 files):
- Figure S1.jpg
- Figure S2.jpg
- Figure S3.jpg
- Table S1_R1.pdf
- Video S1.mp4
